# Supplementary material for: Transcriptomic Analysis of the Spider Venom Gland Reveals Venom Diversity and Species Consanguinity
Source: Toxins (Basel). 2019 Jan 24;11(2):68. doi: 10.3390/toxins11020068 (PMC6409621; doi:10.3390/toxins11020068)
Supplement: Supplementary file 1 [file toxins-11-00068-s001.pdf]

# Supplementary Materials: Transcriptomic Analysis of the Spider Venom Gland Reveals Venom Diversity and Species Consanguinity

Zhaotun Hu, Bo Chen, Zhen Xiao, Xi Zhou and Zhonghua Liu

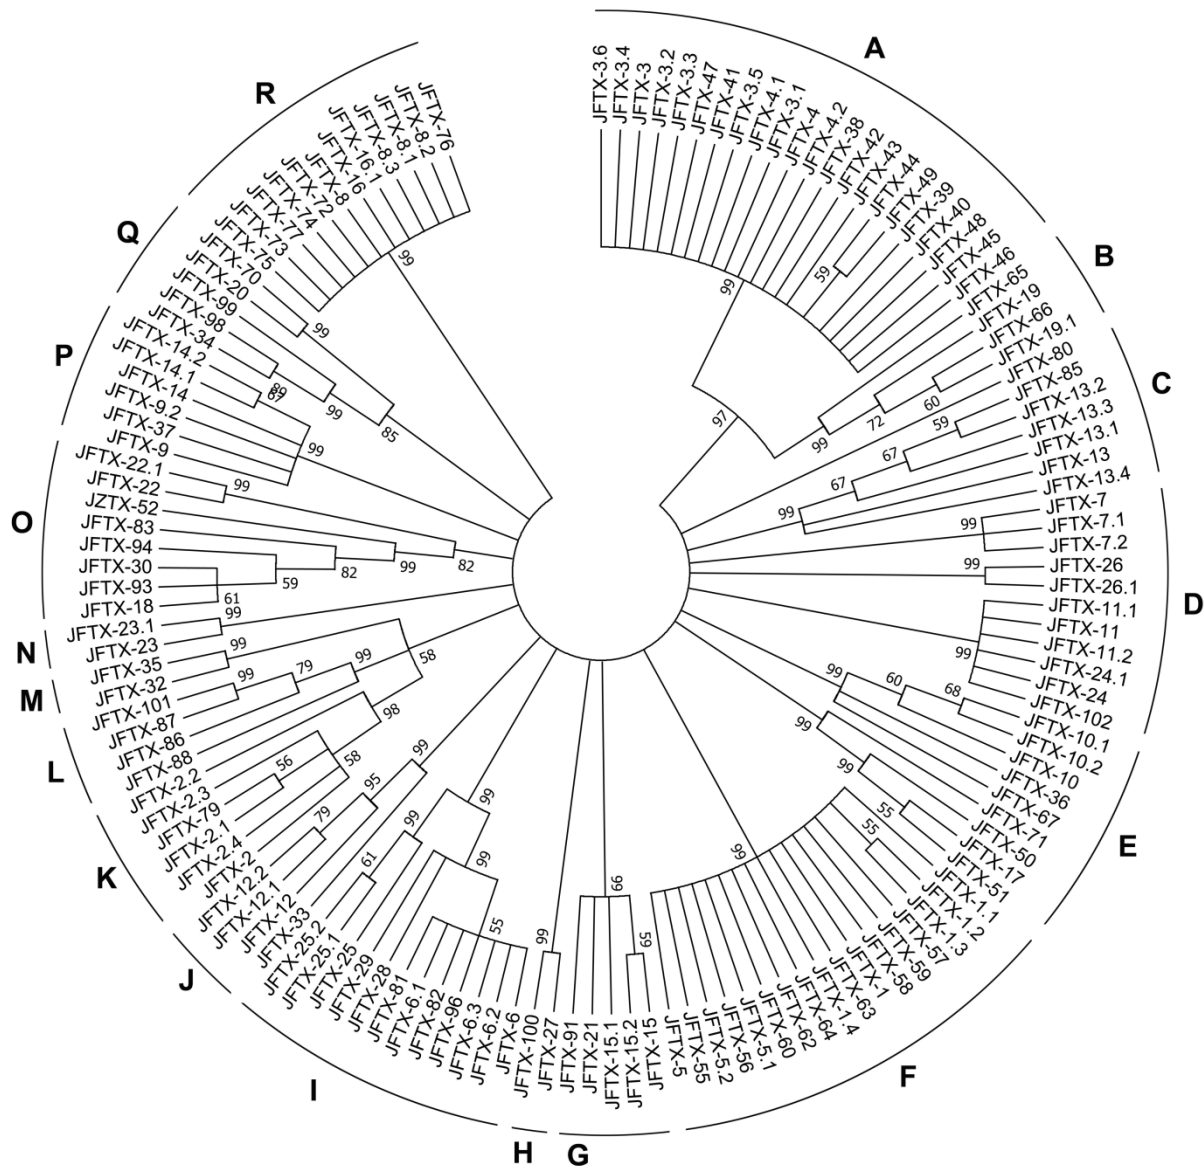

**Figure 1.** Phylogenetic tree of putative toxin precursors from *S. jiafu* venom glands. The phylogenetic analysis was conducted by using the neighbor-joining method of the MEGA 7 software package.
